# Supplementary material
Source: bioRxiv or medRxiv preprint supplement (https://www.biorxiv.org/highwire/filestream/14319/field_highwire_adjunct_files/0/049932-1.pdf)
Supplement: Supplementary file [file 049932-1.pdf]

## Supplementary Materials

Supplementary Table 1. Genomic characteristics of 44 *ARoG* SNPs from SCZ2 analysis.

| RSID       | Chr   | Position  | $p_{SCZ2}$            | $p_{SCZ1}$           | ARoG Cluster | Regulome DB score |
|------------|-------|-----------|-----------------------|----------------------|--------------|-------------------|
| rs10224497 | chr7  | 2149967   | $4.70 \cdot 10^{-11}$ | $6.48 \cdot 10^{-7}$ | 6            | 1b                |
| rs10744560 | chr12 | 2387099   | $1.80 \cdot 10^{-16}$ | $2.02 \cdot 10^{-6}$ | 6            | 7                 |
| rs10773921 | chr12 | 123541606 | $2.03 \cdot 10^{-11}$ | $6.56 \cdot 10^{-3}$ | 5            | 7                 |
| rs10791097 | chr11 | 130718630 | $2.88 \cdot 10^{-12}$ | $2.17 \cdot 10^{-4}$ | 6            | 5                 |
| rs10848428 | chr12 | 123572495 | $1.87 \cdot 10^{-11}$ | $5.83 \cdot 10^{-3}$ | 5            | 7                 |
| rs11191425 | chr10 | 104625970 | $2.04 \cdot 10^{-12}$ | $3.96 \cdot 10^{-5}$ | 5            | 7                 |
| rs11191580 | chr10 | 104906211 | $7.07 \cdot 10^{-16}$ | $2.23 \cdot 10^{-8}$ | 6            | 1f                |
| rs1124131  | chr6  | 28380248  | $9.31 \cdot 10^{-13}$ | $2.59 \cdot 10^{-7}$ | 6            | 6                 |
| rs1150754  | chr6  | 32050758  | $5.15 \cdot 10^{-12}$ | $1.95 \cdot 10^{-4}$ | 5            | 1f                |
| rs12221064 | chr10 | 104677126 | $1.52 \cdot 10^{-14}$ | $1.38 \cdot 10^{-7}$ | 5            | 2b                |
| rs13190754 | chr6  | 26587406  | $5.15 \cdot 10^{-16}$ | $1.04 \cdot 10^{-3}$ | 5            | 6                 |
| rs13219354 | chr6  | 27185664  | $2.77 \cdot 10^{-19}$ | $1.00 \cdot 10^{-6}$ | 6            | 6                 |
| rs1361385  | chr6  | 28358320  | $7.05 \cdot 10^{-13}$ | $2.23 \cdot 10^{-7}$ | 6            | 7                 |
| rs16891725 | chr6  | 26479150  | $1.28 \cdot 10^{-19}$ | $2.82 \cdot 10^{-7}$ | 5            | 1f                |
| rs17379561 | chr1  | 98340139  | $3.33 \cdot 10^{-12}$ | $3.90 \cdot 10^{-5}$ | 6            | 6                 |
| rs1778508  | chr6  | 28229881  | $5.56 \cdot 10^{-17}$ | $5.03 \cdot 10^{-9}$ | 6            | 1d                |
| rs1790121  | chr12 | 123604492 | $7.30 \cdot 10^{-11}$ | $5.92 \cdot 10^{-3}$ | 5            | 4                 |
| rs1892252  | chr6  | 25772639  | $1.83 \cdot 10^{-12}$ | $9.65 \cdot 10^{-6}$ | 6            | 6                 |
| rs200953   | chr6  | 27837267  | $1.22 \cdot 10^{-18}$ | $2.89 \cdot 10^{-7}$ | 6            | 5                 |
| rs200973   | chr6  | 27858421  | $2.00 \cdot 10^{-12}$ | $1.77 \cdot 10^{-4}$ | 6            | 1b                |
| rs2142730  | chr6  | 28266149  | $1.00 \cdot 10^{-10}$ | $7.99 \cdot 10^{-6}$ | 6            | 6                 |
| rs2232423  | chr6  | 28366151  | $4.32 \cdot 10^{-28}$ | $1.98 \cdot 10^{-9}$ | 6            | 5                 |
| rs2283288  | chr12 | 2299048   | $3.39 \cdot 10^{-14}$ | $2.46 \cdot 10^{-4}$ | 6            | 5                 |
| rs2747054  | chr6  | 27783359  | $2.36 \cdot 10^{-19}$ | $3.87 \cdot 10^{-7}$ | 6            | 3a                |
| rs2747429  | chr6  | 29648377  | $2.89 \cdot 10^{-11}$ | $9.35 \cdot 10^{-3}$ | 6            | 1b                |
| rs3734528  | chr6  | 26022244  | $8.50 \cdot 10^{-16}$ | $6.92 \cdot 10^{-6}$ | 6            | 1f                |
| rs3734544  | chr6  | 26468660  | $5.01 \cdot 10^{-19}$ | $2.07 \cdot 10^{-6}$ | 5            | 1f                |
| rs3757188  | chr6  | 28107357  | $1.95 \cdot 10^{-17}$ | $8.52 \cdot 10^{-8}$ | 6            | 7                 |
| rs3857546  | chr6  | 26157762  | $2.11 \cdot 10^{-22}$ | $1.46 \cdot 10^{-9}$ | 5            | 1f                |
| rs4254981  | chr6  | 28371402  | $7.95 \cdot 10^{-13}$ | $2.73 \cdot 10^{-7}$ | 6            | 7                 |
| rs4523552  | chr1  | 98328093  | $3.41 \cdot 10^{-10}$ | $3.47 \cdot 10^{-5}$ | 5            | 5                 |
| rs4917994  | chr10 | 104811699 | $9.19 \cdot 10^{-15}$ | $5.07 \cdot 10^{-7}$ | 5            | 7                 |
| rs6922111  | chr6  | 28325308  | $1.95 \cdot 10^{-20}$ | $7.09 \cdot 10^{-8}$ | 5            | 1f                |
| rs6938200  | chr6  | 27231150  | $1.70 \cdot 10^{-17}$ | $1.69 \cdot 10^{-6}$ | 6            | 6                 |
| rs7092200  | chr10 | 104844872 | $3.87 \cdot 10^{-13}$ | $1.44 \cdot 10^{-6}$ | 6            | 5                 |
| rs7148456  | chr14 | 104028270 | $2.30 \cdot 10^{-12}$ | $3.36 \cdot 10^{-3}$ | 5            | 1f                |
| rs732998   | chr10 | 104897901 | $1.60 \cdot 10^{-15}$ | $9.50 \cdot 10^{-8}$ | 6            | 6                 |
| rs742047   | chr6  | 27739380  | $6.81 \cdot 10^{-11}$ | $7.38 \cdot 10^{-6}$ | 6            | 1f                |
| rs7526108  | chr1  | 98305394  | $3.02 \cdot 10^{-11}$ | $1.36 \cdot 10^{-5}$ | 6            | 7                 |
| rs7822538  | chr8  | 143323109 | $3.73 \cdot 10^{-11}$ | $9.50 \cdot 10^{-4}$ | 6            | 5                 |
| rs9283880  | chr6  | 27715243  | $8.26 \cdot 10^{-11}$ | $2.78 \cdot 10^{-6}$ | 6            | 6                 |
| rs9295661  | chr6  | 25450026  | $2.01 \cdot 10^{-16}$ | $2.10 \cdot 10^{-5}$ | 6            | 1f                |
| rs9393708  | chr6  | 26362643  | $8.80 \cdot 10^{-19}$ | $1.19 \cdot 10^{-6}$ | 6            | 1f                |
| rs943036   | chr10 | 104836047 | $5.06 \cdot 10^{-15}$ | $2.59 \cdot 10^{-7}$ | 6            | 5                 |

Supplementary Table 2. Simulation setting with the annotation predictor matrix from the PGC autism GWAS analysis.

| Cluster | $\beta$                                                                       | $\sigma$ | $\pi$ |
|---------|-------------------------------------------------------------------------------|----------|-------|
| 1       | $(0, 0.5, -0.5, 0, 0, 1, \underbrace{0, \dots, 0}_{200 \text{ repetitions}})$ | 0.2      | 0.1   |
| 2       | $(0, 0, 0, -0.5, -1, 0, \underbrace{0, \dots, 0}_{200 \text{ repetitions}})$  | 0.2      | 0.1   |
| 3       | $(\underbrace{0, \dots, 0}_{206 \text{ repetitions}})$                        | 0.8      | 0.8   |

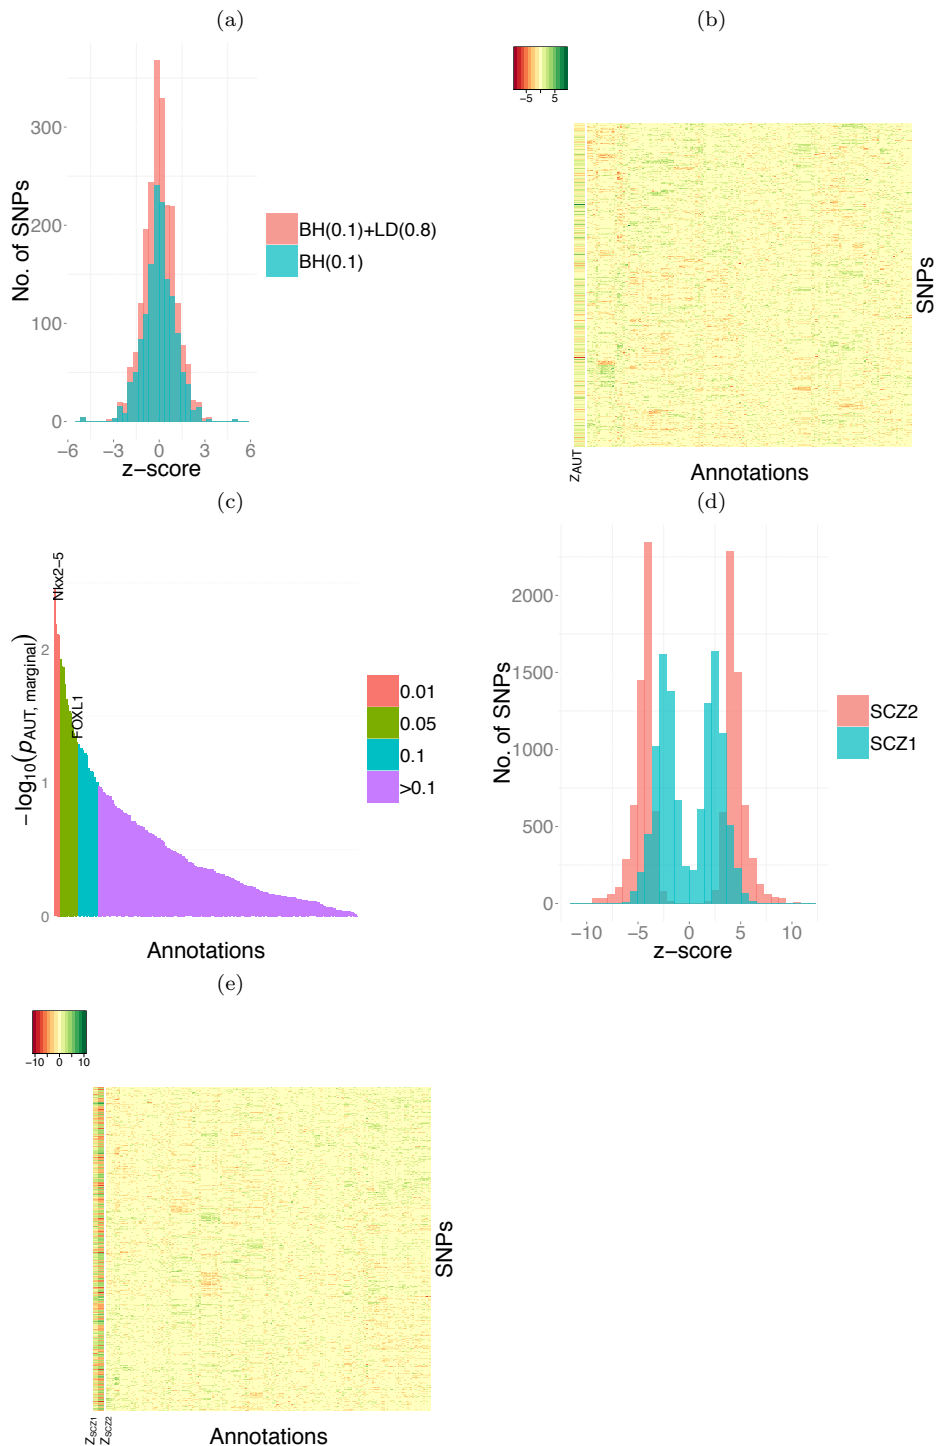

Supplementary Figure 1. (a) Histogram of autism z-scores for SNPs with BH adjusted p-values smaller than equal to 0.1 and their LD partners ( $r^2 \geq 0.8$ ). (b) Heatmap of annotation scores with autism z-scores (leftmost column). (c) Ranking of TFs based on marginal regressions of autism z-scores on annotations scores for each TF. Nkx2-5 and FOXL1 TFs that are identified as associated with the z-scores by ARoG in Section 4.1 are labeled. (d) Histogram of the z-scores of all 11,386 SNPs from both SCZ1 and SCZ2 studies. (e) Heatmap of annotation scores with schizophrenia z-scores from SCZ1 and SCZ2 (leftmost two columns).

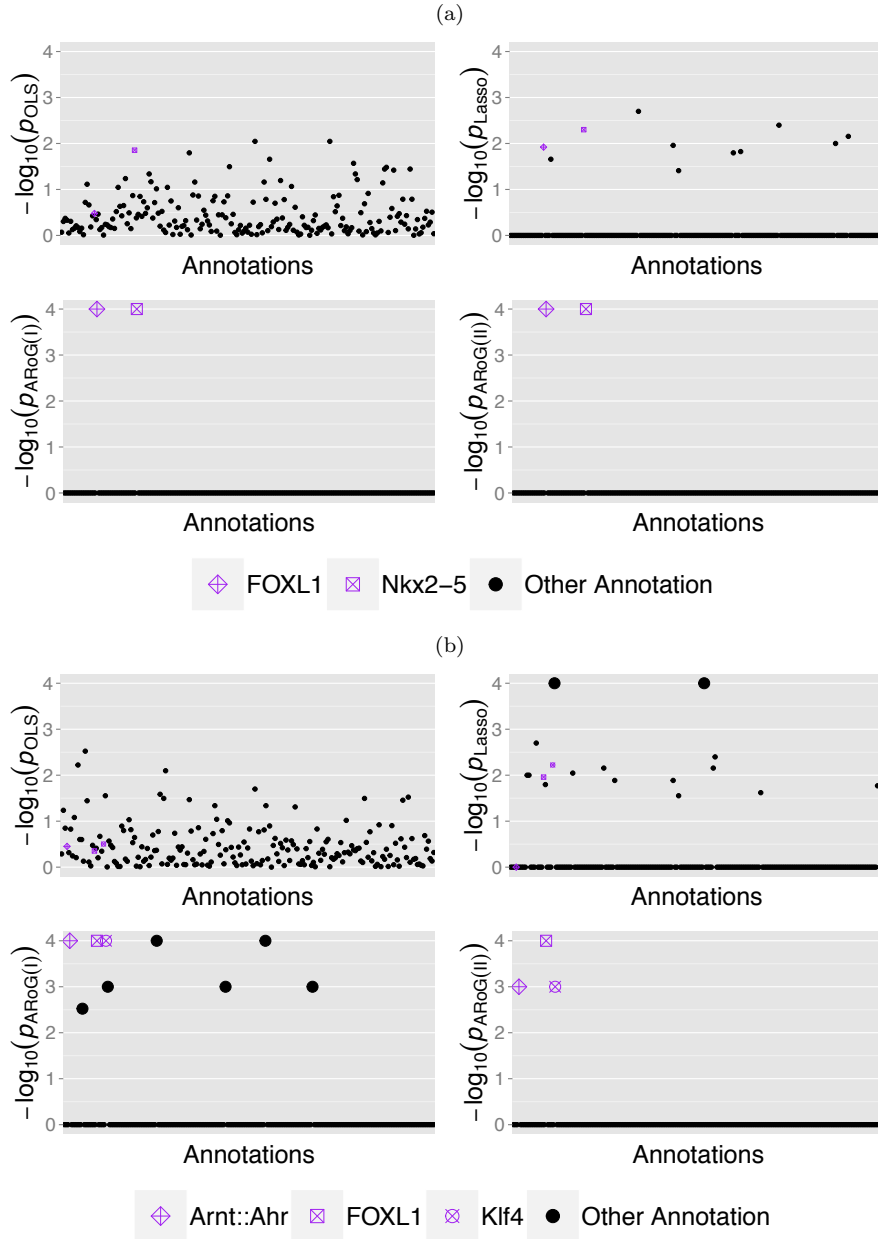

Supplementary Figure 2. (a) Permutation p-values of the 205 annotations in the autism application. Annotations reaching BH adjusted p-values at level 0.1 are depicted with enlarged plotting symbols. (b) Permutation p-values of the 205 annotations in the SCZ2 application. Annotations reaching BH adjusted p-values at level 0.1 are depicted with enlarged plotting symbols. In both panels, permutation p-values of 0 are depicted as negative log p-values of 4.

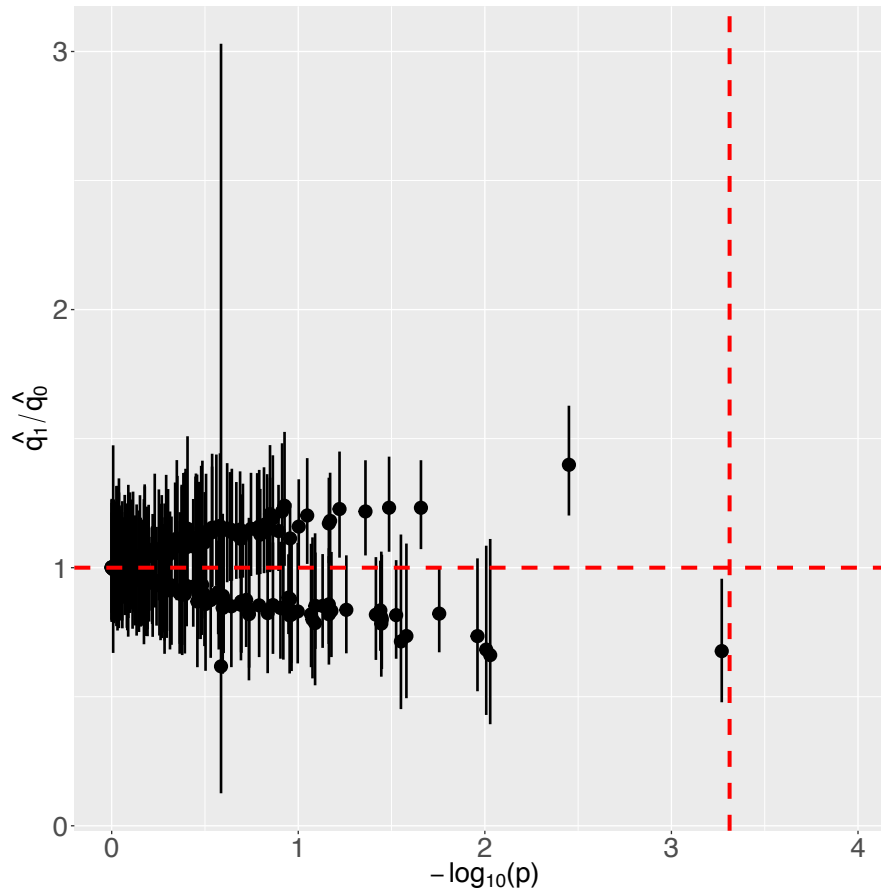

Supplementary Figure 3. Application of GPA [9] to the autism dataset. The plot depicts  $-\log_{10}(\text{p-values})$  from the enrichment test vs. the estimated enrichment ratio  $\hat{q}_{1j}/\hat{q}_{0j}$ ,  $j = 1, \dots, 205$ , where  $\hat{q}_{1j}$  and  $\hat{q}_{0j}$  denote the estimated proportions of non-null and null SNPs with the  $j$ -th annotation, respectively. The 95% confidence intervals are depicted with vertical lines for each individual annotation. The red dashed vertical line corresponds to Bonferroni cut-off at significance level of 0.1 and the red dashed horizontal line corresponds to the equal enrichment of annotations in the estimated null and non-null GWAS SNP sets.

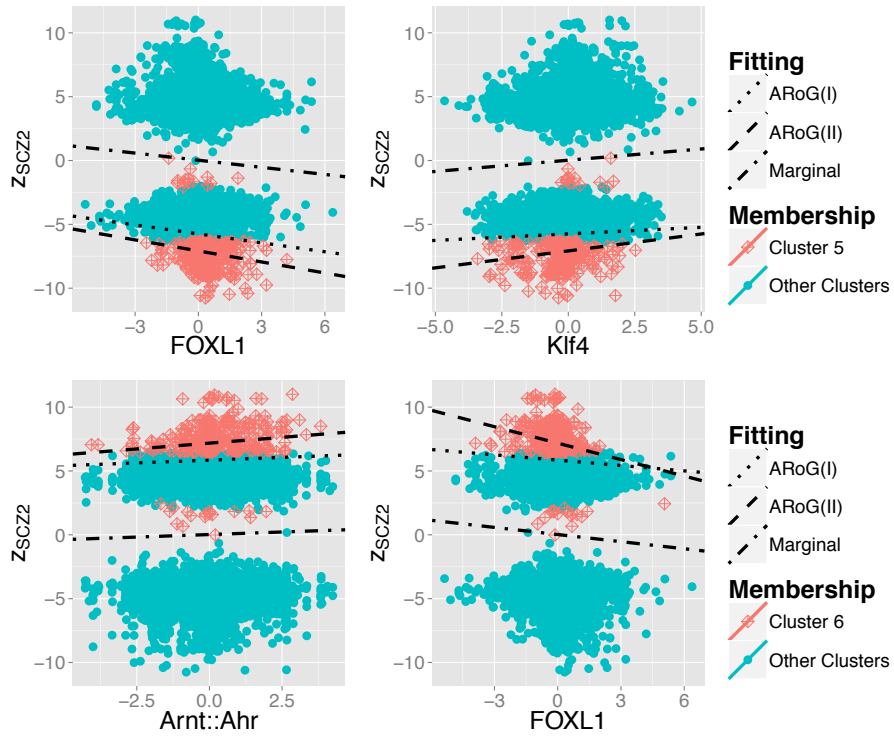

Supplementary Figure 4. SCZ2 z-scores vs. annotation scores of FOXL1, Klf4 TFs selected for cluster 5 and Arnt::Ahr and FOXL1 TFs selected for cluster 6. Both marginal linear regression and AROG line fits are included.

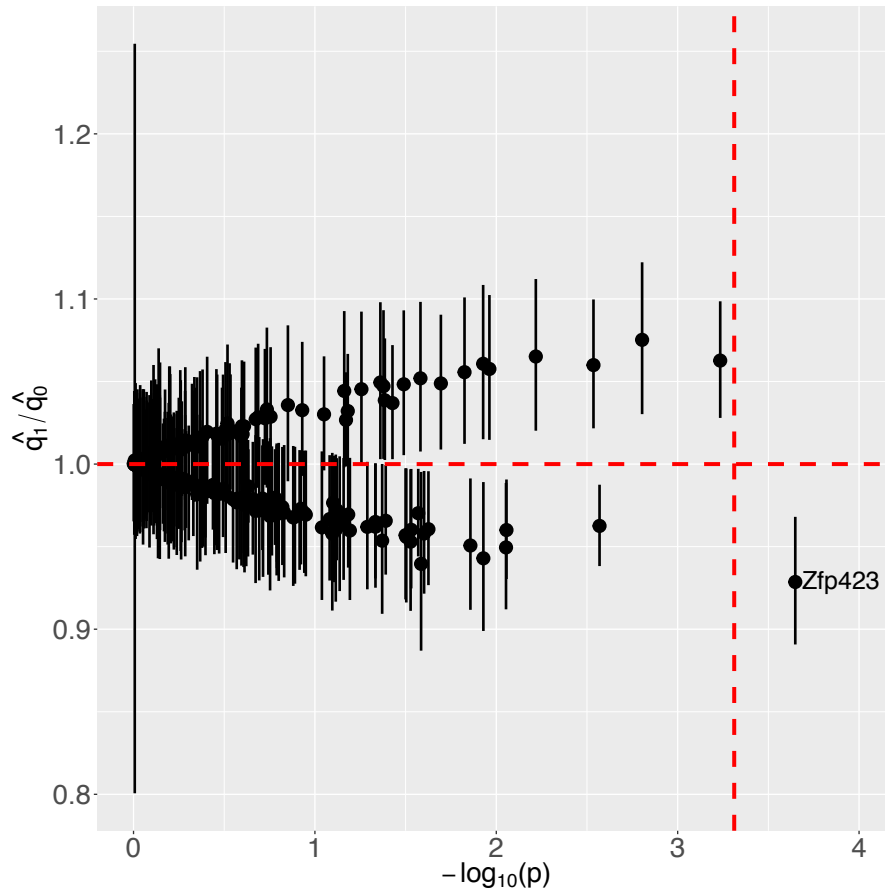

Supplementary Figure 5. Application of GPA [9] to the SCZ2 dataset. The plot depicts  $-\log_{10}(\text{p-values})$  from the enrichment test vs. the estimated enrichment ratio  $\hat{q}_{1j}/\hat{q}_{0j}$ ,  $j = 1, \dots, 205$ , where  $\hat{q}_{1j}$  and  $\hat{q}_{0j}$  denote the estimated proportions of non-null and null SNPs with the  $j$ -th annotation, respectively. The 95% confidence intervals are depicted with vertical lines for each individual annotation. The red dashed vertical line corresponds to Bonferroni cut-off at significance level of 0.1 and the red dashed horizontal line corresponds to the equal enrichment of annotations in the estimated null and non-null GWAS SNP sets.

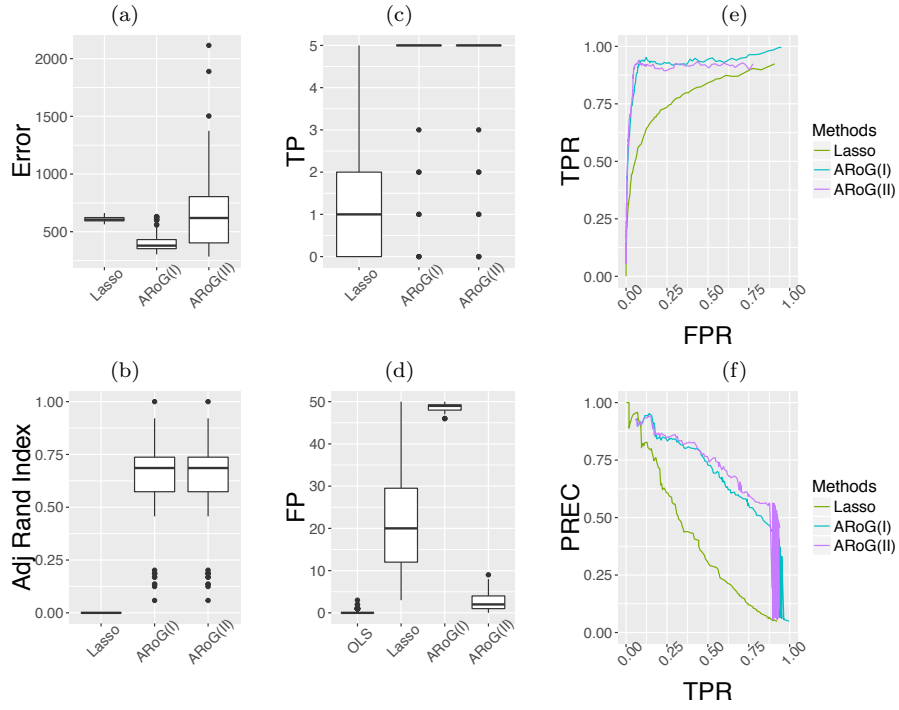

Supplementary Figure 6. Simulation results for Sparse(I) setting of Table 3.



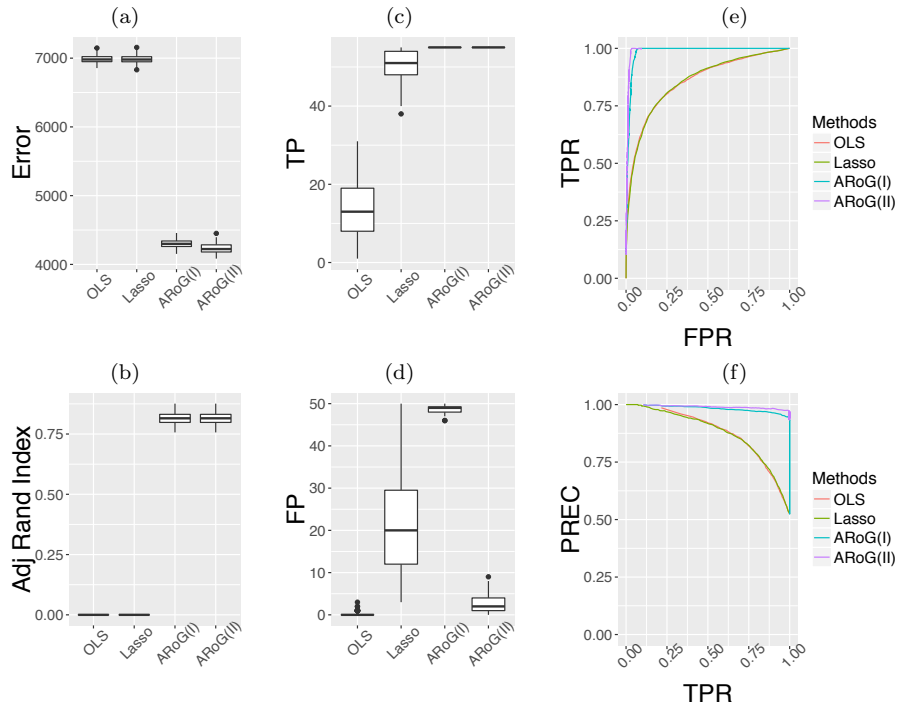

Supplementary Figure 7. Simulation results for Intermediate(I) setting of Table 3.

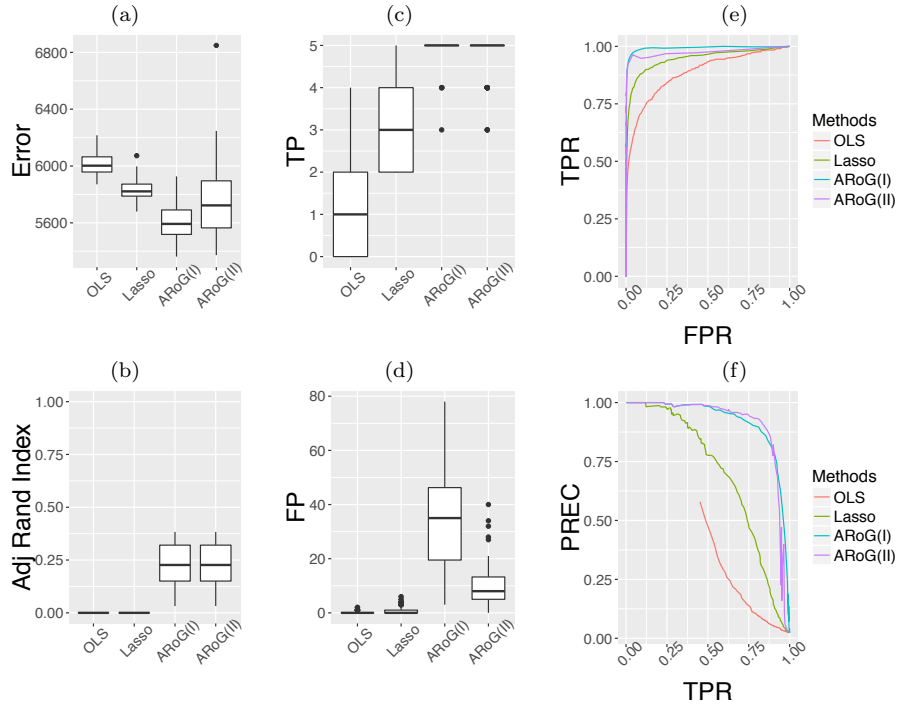

Supplementary Figure 8. Simulation results from Supplementary Table 2 setting.

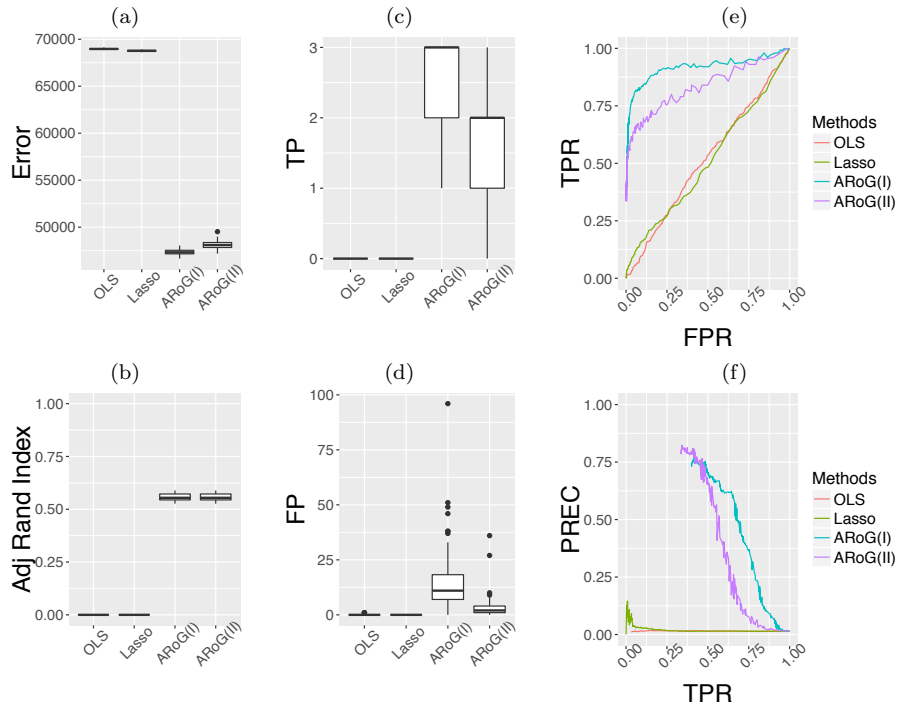

Supplementary Figure 9. Simulation results for the SCZ2 data analysis driven setting.
